# Supplementary material for: Insulin resistance in type 1 diabetes is a key modulator of platelet hyperreactivity
Source: Springer Nature journal article supplement (doi:10.1007/s00125-025-06429-z), 2025-04-30
Supplement: MOESM1 [file 125_2025_6429_MOESM1_ESM.pdf]

Electronic supplementary data.

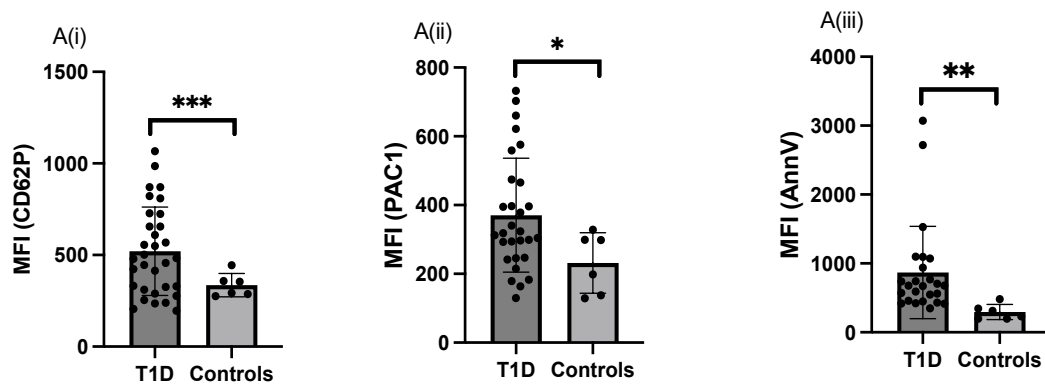

**ESM Figure 1;** Multiparameter fluorescent flow cytometry to show platelet expression under basal conditions for patients with T1D and healthy controls for A(i) CD62P, A(ii) PAC1 and A(iii) PS. \* $p < 0.05$ , \*\* $p < 0.01$ , \*\*\* $p < 0.001$ .

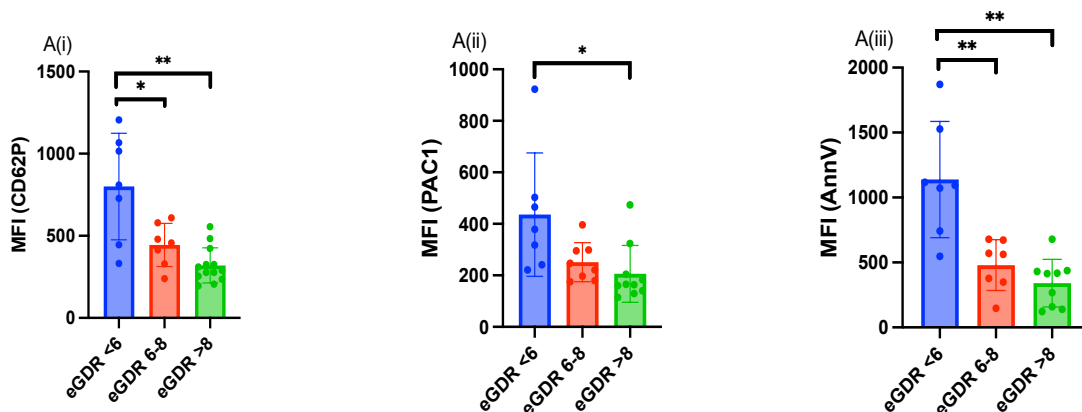

**ESM Figure 2;** Multiparameter fluorescent flow cytometry to show platelet expression under basal conditions for patients with T1D stratified according to insulin resistance measured by eGDR. Markers investigated are; A(i) CD62P, A(ii) PAC1 and A(iii) PS. \* $p < 0.05$ , \*\* $p < 0.01$ , \*\*\* $p < 0.001$ .
